# Supplementary material for: How to squat? Effects of various stance widths, foot placement angles and level of experience on knee, hip and trunk motion and loading
Source: PubMed Central journal article supplement (PMC6050697; doi:10.1186/s13102-018-0103-7), 2018-07-17

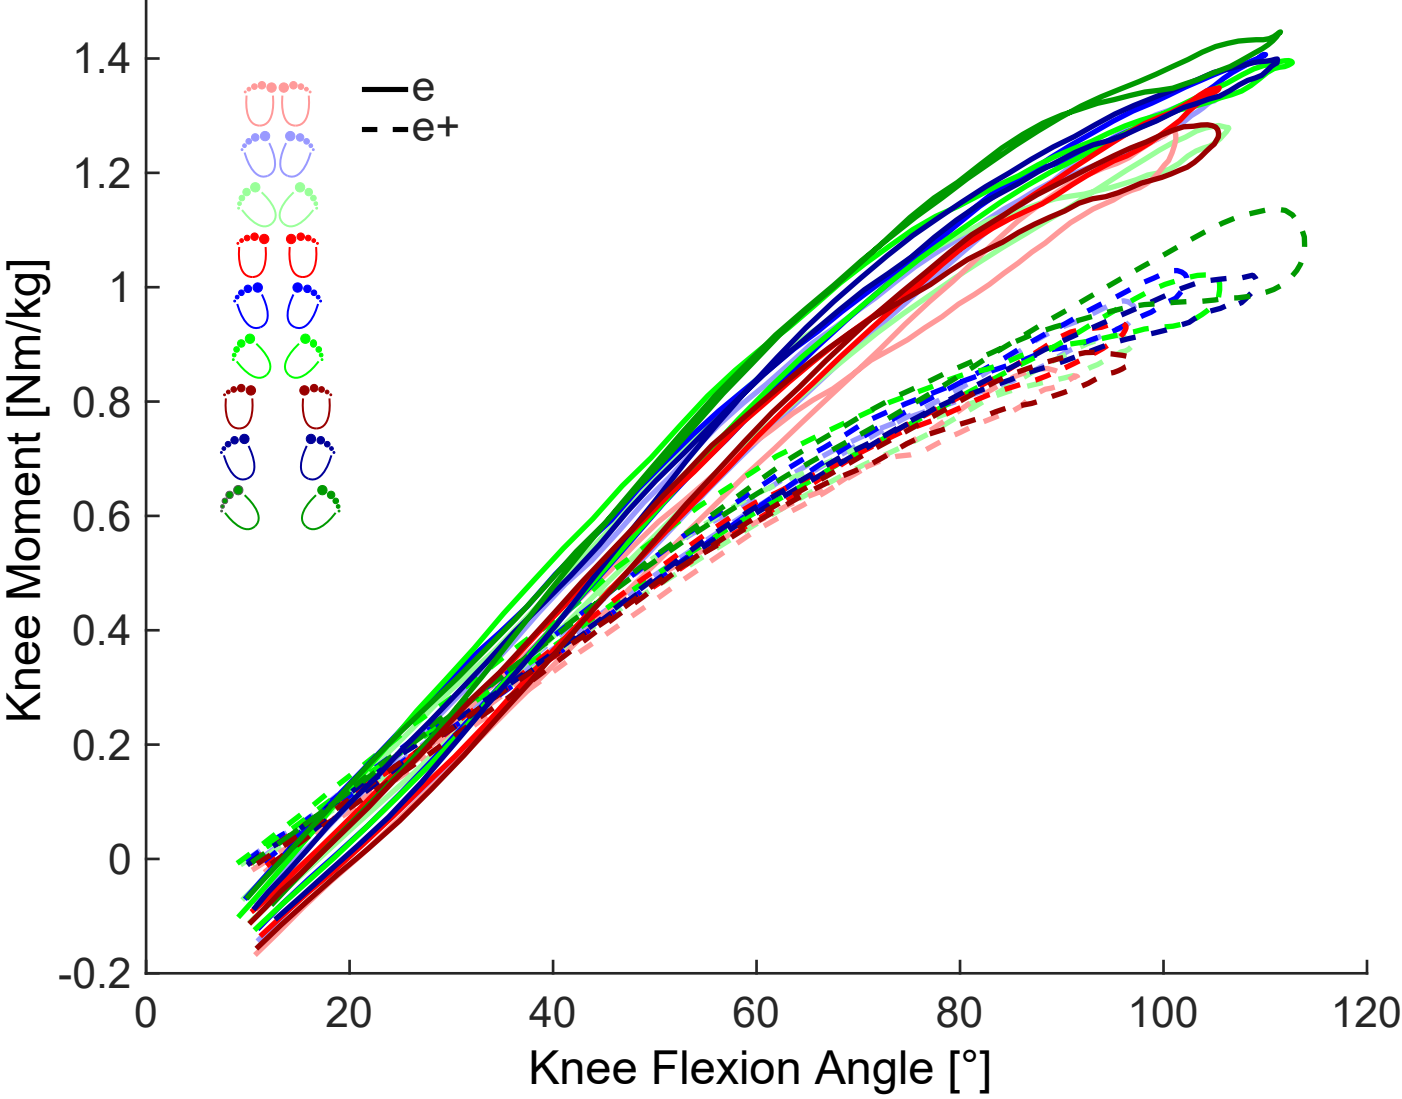

Supplement: 13102_2018_103_MOESM2_ESM.pdf [file 13102_2018_103_MOESM2_ESM.pdf]
