# Supplementary material for: How to squat? Effects of various stance widths, foot placement angles and level of experience on knee, hip and trunk motion and loading
Source: Springer Nature journal article supplement (doi:10.1186/s13102-018-0103-7), 2018-07-17

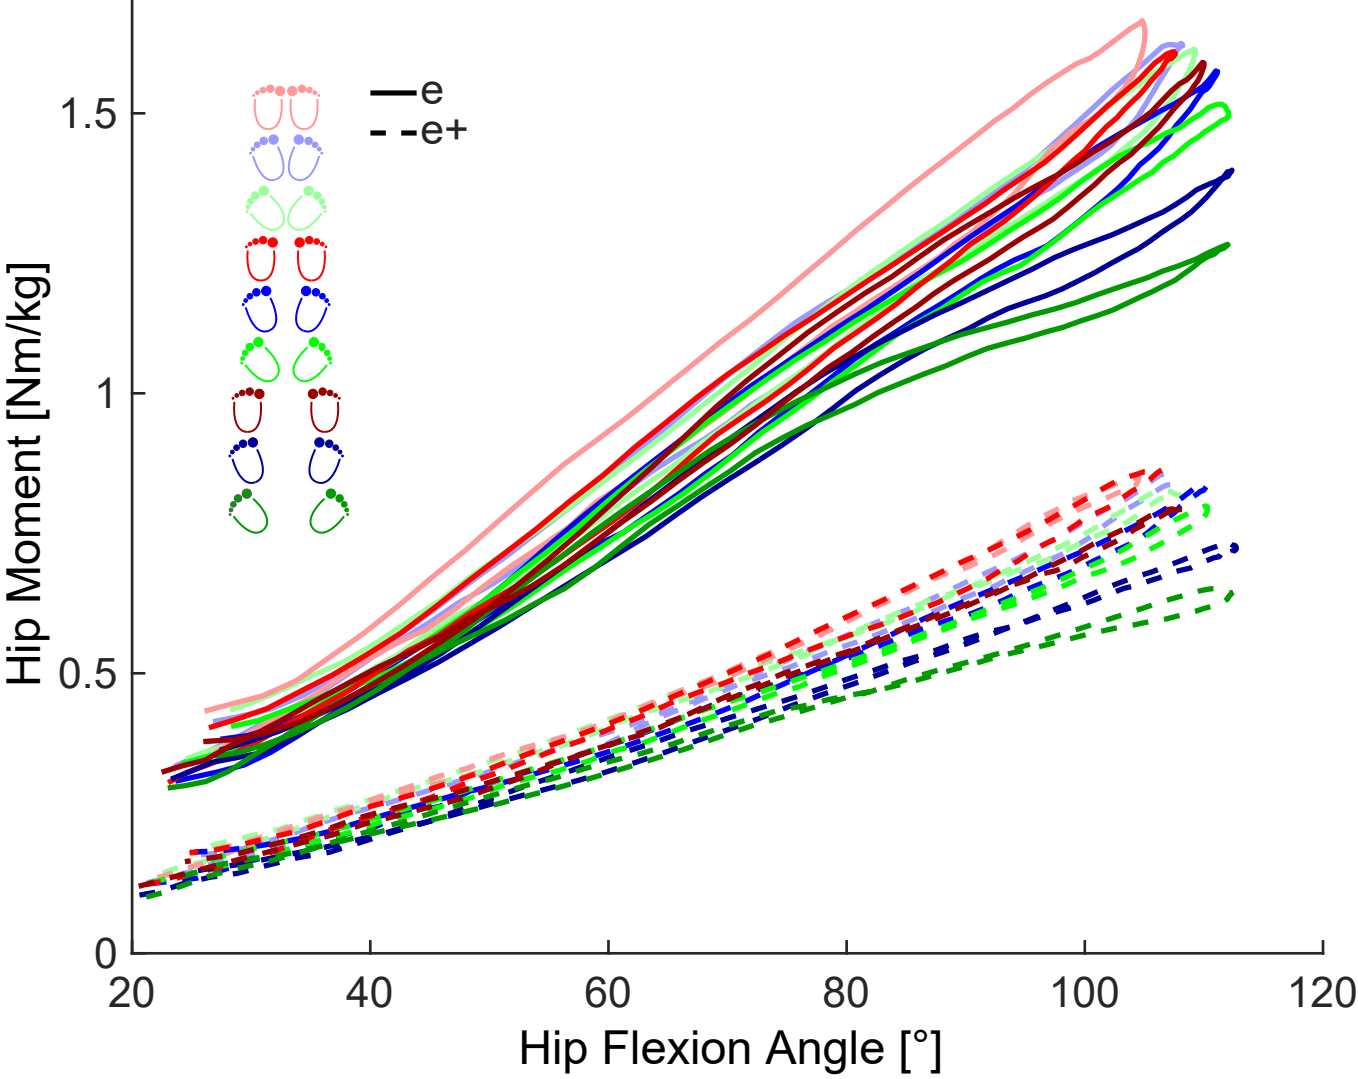

Supplement: MOESM1 [file 15959638]
